# Supplementary material for: Photocatalytic nitrogen fixation on transition metal modified TiO2 nanosheets under simulated sunlight
Source: Royal Society of Chemistry journal article supplement (doi:10.1039/d0nj04397d), 2020-01-01
Supplement: d0nj04397d1.pdf [file d0nj04397d1.pdf]

Appendix A. Supplementary data for

Photocatalytic nitrogen fixation on Transition Metal  
modified TiO<sub>2</sub> nanosheets under simulated sunlight

*Yifan Liu, Zirui Yu, Shanshan Guo, Lulu Yao, Runze Sun, Xiuying Huang and Weirong Zhao \**

Department of Environmental Engineering, Zhejiang University, Hangzhou 310058,  
China

Number of pages (including cover page): 2

Number of Figures: 2

\*Corresponding author

Tel.: +86-571-8898-2032; fax: +86-571-8898-2032.

E-mail address: wrzhao@vip.163.com (Weirong Zhao)

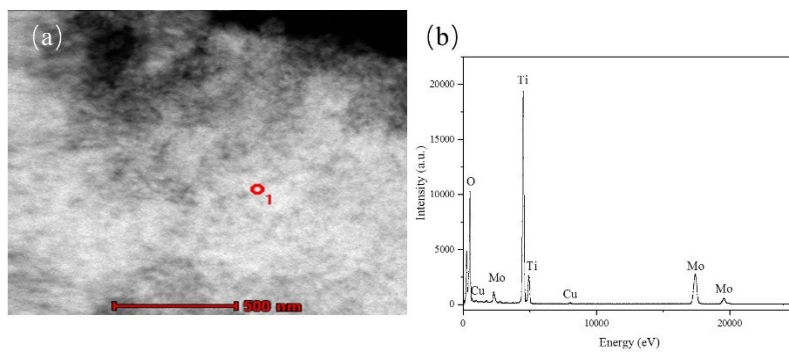

Fig. S1 EDX spectra of Cu/TiO<sub>2</sub>-1.0%

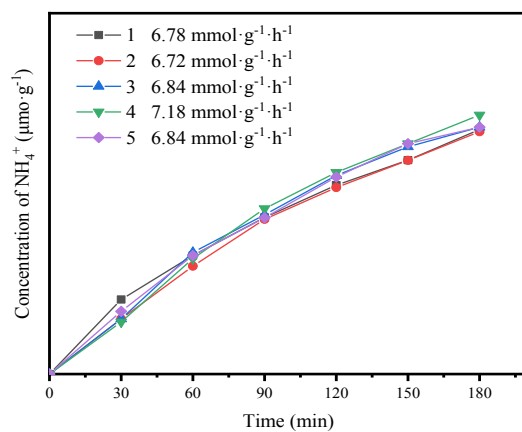

Fig. S2 Five independent experiments for Cu/TiO<sub>2</sub>-1.0%
